# Supplementary material
Source: PubMed Central journal article supplement (PMC3268441)
Supplement: supp_M111.300749_jbc.M111.300749-1.pdf [file supp_M111.300749_jbc.M111.300749-1.pdf]

**SUPPLEMENTAL DATA****Rapamycin and Glucose-TOR Signaling in Plants**

Yan Xiong and Jen Sheen

**Supplementary Table 1. Primers used for constructs.**

| <i>Name</i>           | <b>Forward primer</b>     | <b>Reverse primer</b>    |
|-----------------------|---------------------------|--------------------------|
| <b><i>S6K1</i></b>    | ATGGTTTCCTCTCAGCGTCC      | CAAAGTAGTTGTGGACTGGTGA   |
| <b><i>S6K2</i></b>    | ATGGTTTCTTCTCAGTGTTCTGTTG | CAAGTTGGATGTGGTCCGAT     |
| <b><i>FKP12</i></b>   | ATGGGAGTGCAGGTGGAA        | TTCCAGTTTTAGAAAGCTCCACAT |
| <b><i>FKP15.1</i></b> | ATGATGAGCTCTGCATCCG       | AAGCTCATTCTTTGATTTCGCT   |
| <b><i>FKB15.2</i></b> | ATGGCGAGCAAGATGAGTCT      | TAGCTCGTCATTTCCATATCCC   |
| <b><i>FKP20.1</i></b> | ATGGGTGATGCAATCGATTT      | TTAGCTTTGCCTTTGCCTTT     |
| <b><i>FKP42</i></b>   | ATGGATGAATCTCTGGAGCATC    | ATCTGCTTTAACTCTGTGGCG    |
| <b><i>FKP62</i></b>   | ATGGATGCTAATTTTCGAGATGC   | AGACCTCAGGTGCTCATTGC     |
| <b><i>FKP65</i></b>   | ATGGAAGACGATTTTCGACACG    | TGCCTTGGTGTCAATACTCATC   |
| <b><i>FKP72</i></b>   | ATGGCGGTAGGCGATCAG        | TGTAAATTTGGCGCTCACAA     |

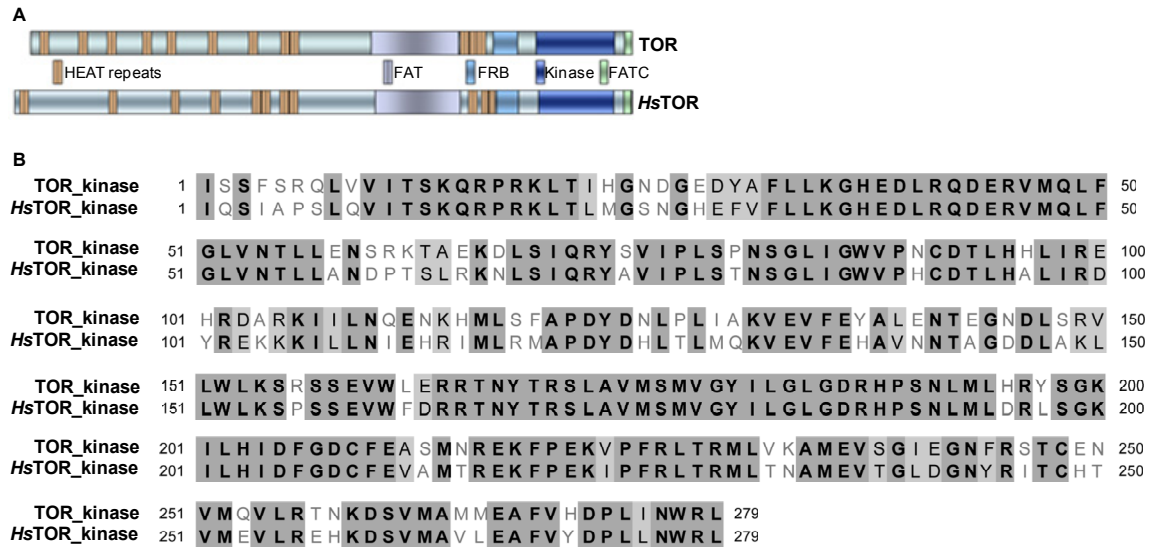

**Figure S1. TOR PKs are highly conserved in human and *Arabidopsis*.** A, Domain organization of human and *Arabidopsis* TOR PKs. HEAT repeats: Huntingtin, Elongation factor 3, subunit of protein phosphatase 2A and TOR1; FAT: FRAP, ATM and TRRAP domain; FRB: FKP12-rapamycin binding domain. FATC: Carboxy-terminal FAT domain. B, Alignment of the catalytic kinase domain of human and *Arabidopsis* TOR proteins.

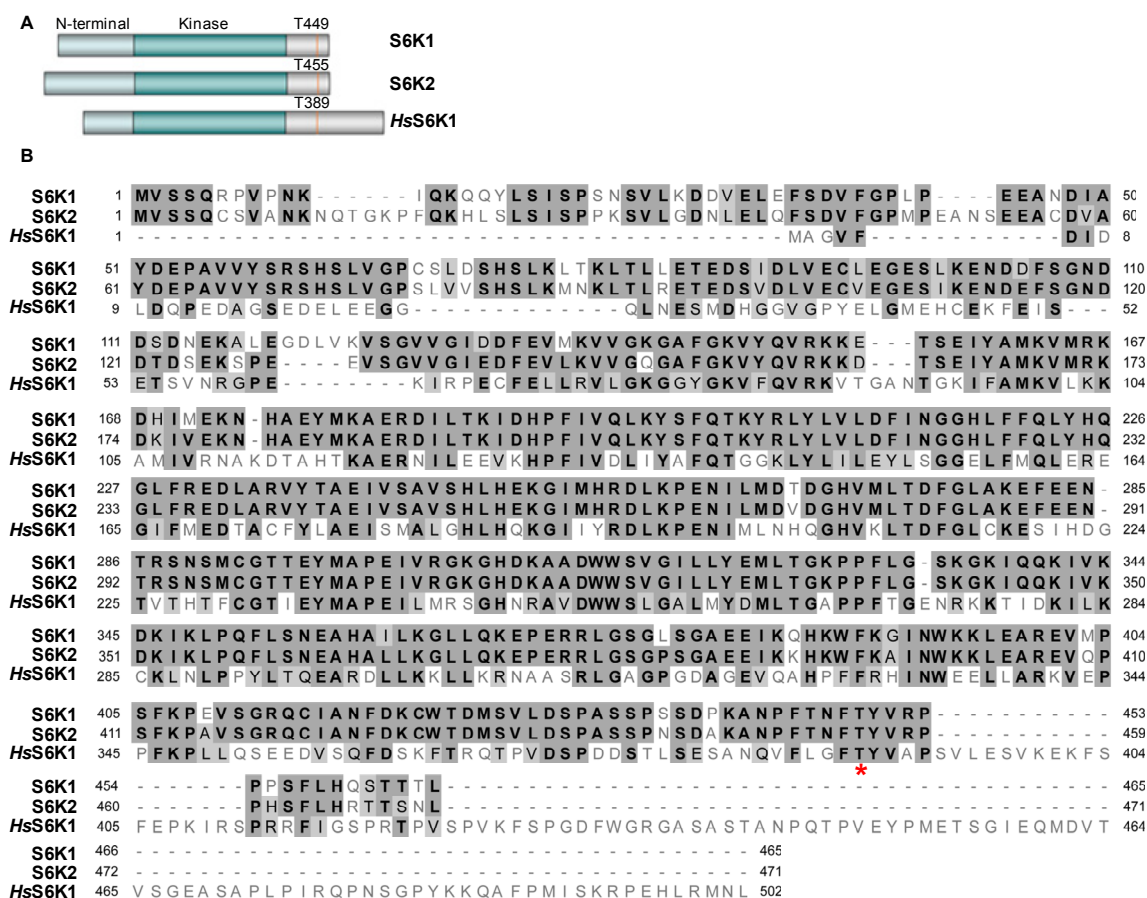

**Figure S2. S6Ks are highly conserved in human and *Arabidopsis*.** A, Domain organization of human and *Arabidopsis* S6 kinases. B, Alignment of human and *Arabidopsis* S6 kinases. Asterisk indicates the conserved TOR phosphorylation sites.

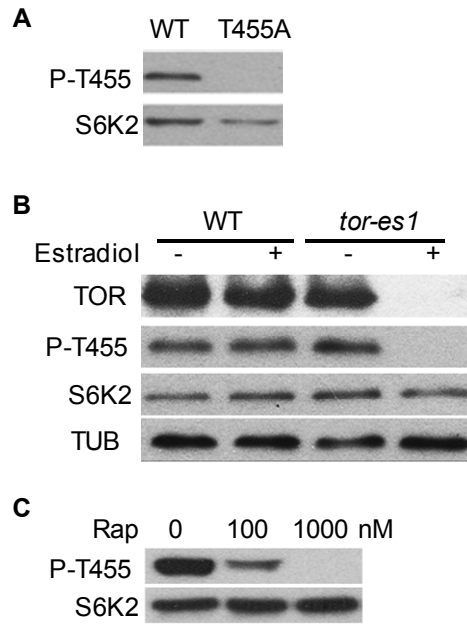

**Figure S3. T455 phosphorylation of S6K2.** A, T455 phosphorylation specificity of S6K2. FLAG-tagged WT or mutant S6K2 (T455A) was transiently expressed in protoplasts. Total proteins were analyzed by protein blot analysis using anti-p-T389 (P-T455) or anti-FLAG (S6K2) antibody. B, T455 phosphorylation is abolished in the *tor* mutant. WT or conditional *tor* mutant protoplasts expressing FLAG-tagged S6K2 were treated without or with estradiol (10  $\mu$ M). Total proteins were analyzed by protein blot analysis probed with anti-TOR (TOR), anti-p-T389 (P-T455) or anti-FLAG (S6K2) antibody. Tubulin (TUB) was used as a loading control. C, T455 phosphorylation of S6K2 is inhibited by rapamycin (Rap).

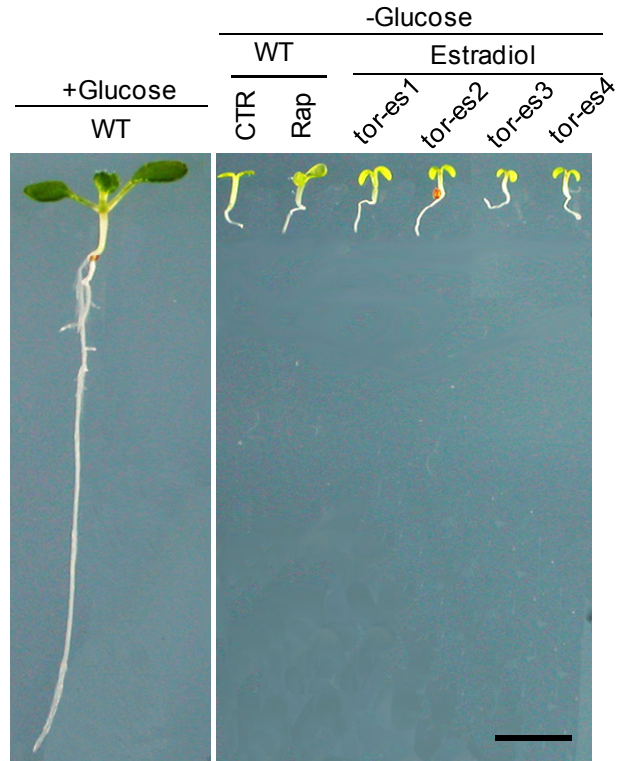

**Figure S4. Growth of *Arabidopsis* seedlings relies on glucose.** WT and estradiol-inducible *tor* mutants were grown in liquid MS medium without any sugar or with 30 mM glucose for 9 days. Scale bar: 5 mm.

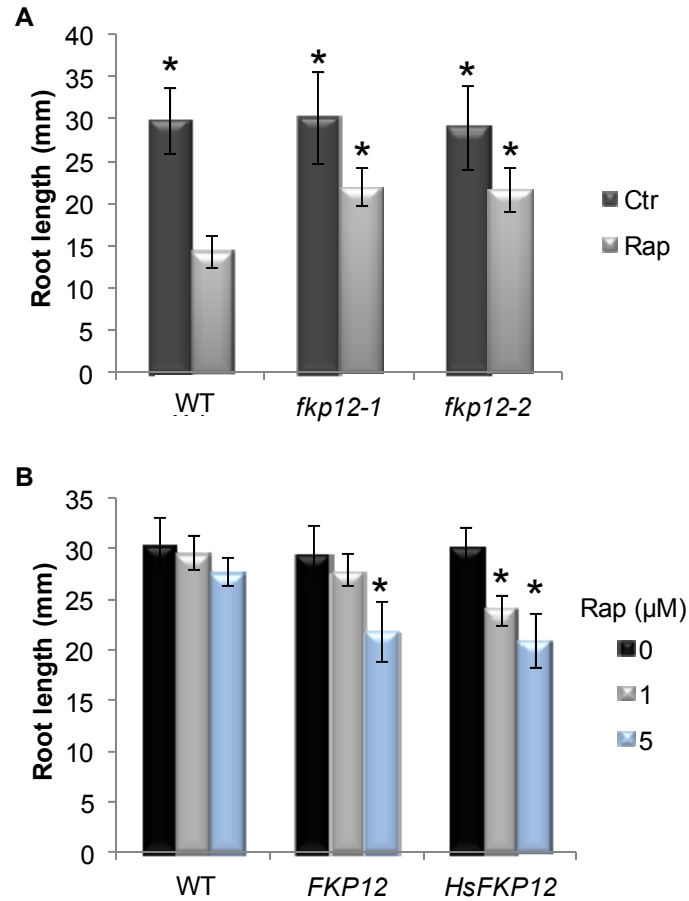

**Figure S5. FKP12 is required for inhibition of seedlings growth by rapamycin.** A, The inhibition effect of rapamycin on seedlings growth is relieved in *fkp12* mutants. The average root length was measured after 9 days of rapamycin (Rap, 10  $\mu$ M) treatment. Results represent means  $\pm$  SD (n=3). \* indicates a significant difference with  $p < 0.05$  when compared with data from wild type (WT) treated with rapamycin, based on the results of an unpaired Student's t test. B, Overexpression of *Arabidopsis* or human FKP12 enhances the rapamycin inhibition on seedlings growth. The average root length was measured after 9 days of rapamycin (Rap) treatment. Results represent means  $\pm$  SD (n=3). \* indicates a significant difference with  $p < 0.05$  when compared with data from wild type (WT) untreated with rapamycin, based on the results of an unpaired Student's t test.

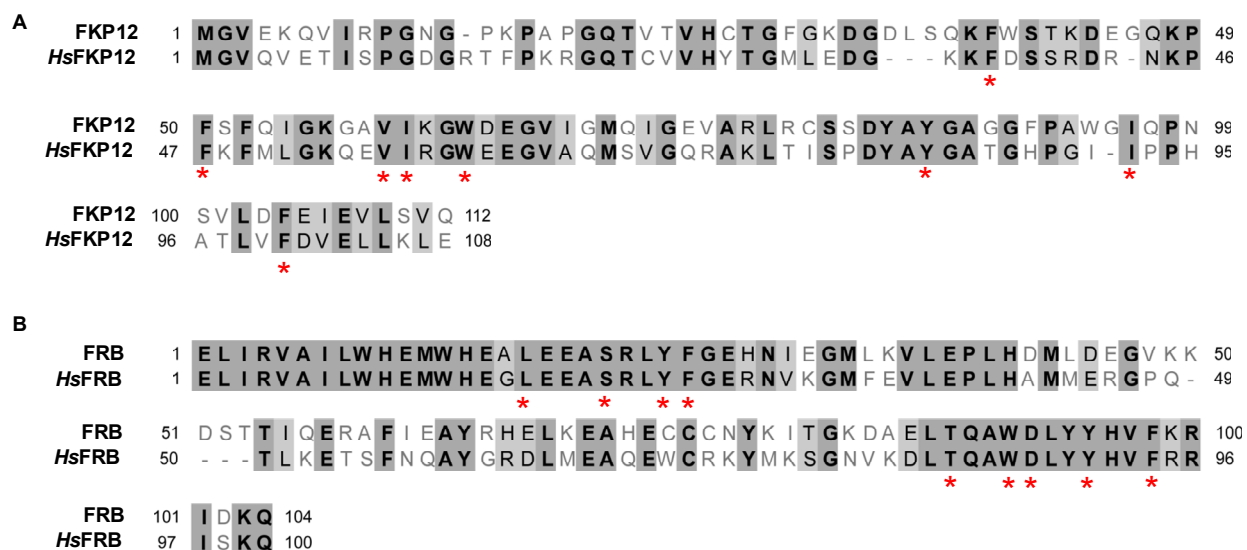

**Figure. S6. FKP12s and TOR-FRB domains are highly conserved in human and *Arabidopsis*.** Alignment of FKP12 proteins (A) and TOR-FRB domain (B) between human and *Arabidopsis*. Asterisks indicate conserved residues of human FKP12 and FRB that interact with rapamycin (1).

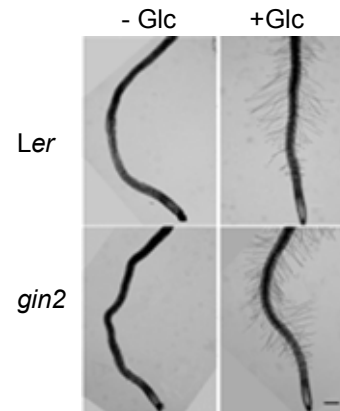

**Figure S7. Root hairs are not affected in the *gin2* mutant.** *Ler* and *gin2* were germinated with or without glucose (30 mM) for 4 days. Scale bar: 200  $\mu$ m.

## REFERENCES

1. Choi, J., Chen, J., Schreiber, S.L., and Clardy, J. (1996) *Science* 273, 239-242
